# Supplementary figures and images for: Analysis of Promoter Methylation of the Bovine FOXO1 Gene and Its Effect on Proliferation and Differentiation of Myoblasts
Source: MDPI journal article supplement (doi:10.3390/ani13020319), 2023-01-16

## Supplementary Materials:

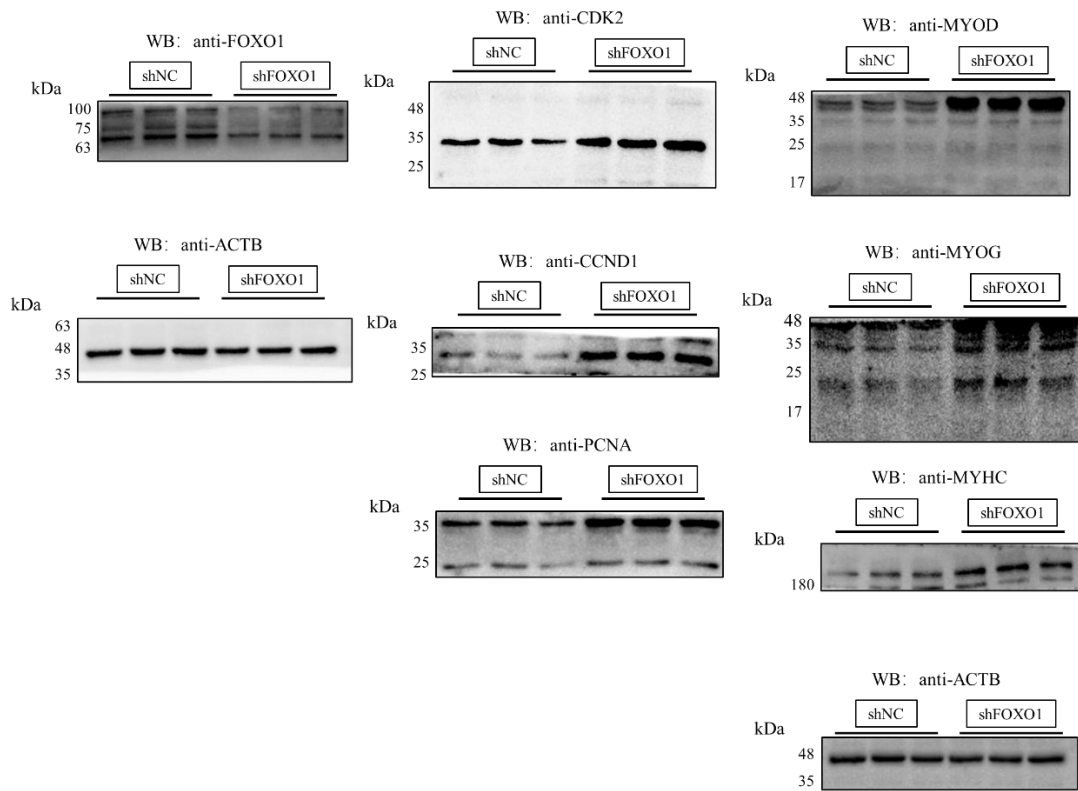

Figure S2. Original western blot figures

Supplement: s1 [file s1]
